# Supplementary material for: Estrogen Receptor Subtypes Elicit a Distinct Gene Expression Profile of Endothelial-Derived Factors Implicated in Atherosclerotic Plaque Vulnerability
Source: MDPI journal article supplement (doi:10.3390/ijms231810960), 2022-09-19
Supplement: s1 [file s1]

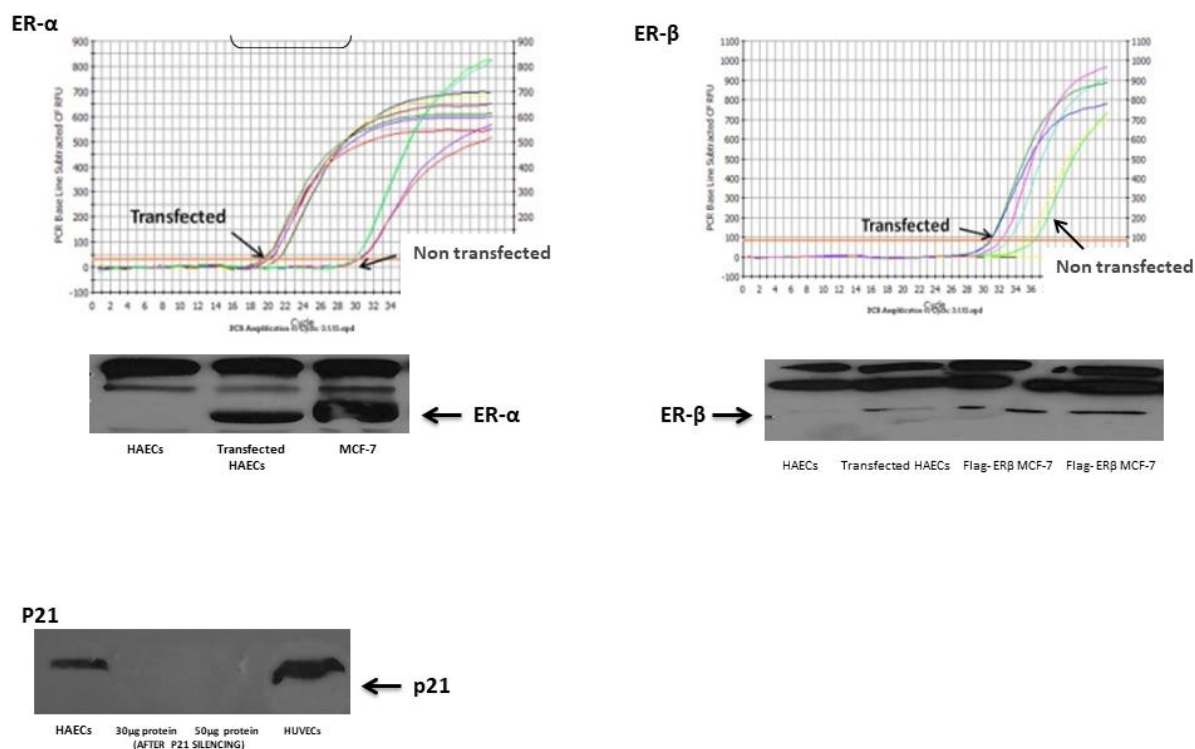

**Figure S1.** The efficiency of ER- $\alpha$  and ER- $\beta$  transfection as well as P21 silencing was evaluated by qPCR and Western blot analysis.
